# Supplementary material for: Rates of Hypoglycemia Predicted in Patients with Type 2 Diabetes on Insulin Glargine 300 U/ml Versus First- and Second-Generation Basal Insulin Analogs: The Real-World LIGHTNING Study
Source: Springer Nature journal article supplement (doi:10.1007/s13300-019-0568-8), 2019-02-14
Supplement: MOESM1 [file 16481166]

## Supplementary Table S1. Matched variables in the propensity score matching population

| **Variable** | **Definition** |
| --- | --- |
| Duration from Gla-300 launch | Days since Gla-300 official launch |
| Age | Calculated from treatment index date |
| Gender | Male/female |
| Prior severe hypoglycemic events in the  12-month period prior to indexing | Count of events |
| Non-adherence proxy | Patient classified as non-adherent when interval between subsequent BI scripts was greater than 120 days within 1 year prior to index date |
| Co-prescription | GLP1-RA |
| Comorbidities | Cardiovascular: heart failure |
|  | Cardiovascular: abnormal heart rhythm |
|  | Cardiovascular: other complications |
|  | Cancer |
|  | Chronic renal disease |
|  | Diabetic neuropathy |
|  | Thyroid disease |
| Duration since diabetes diagnosis | Days since initial record of diagnosis for the patient |
| Insulin experience | Determined by an exponential decay starting 90 days after time of previous insulin with half-life of 30 days in the 1 year prior to index date |
| Line of BI treatment | The order of BIs used, eg, if an individual was using their third BI during the patient-treatment period, the line of treatment number would be 3 (third-line BI treatment). |
| Most recent HbA1c measure | From treatment index date |

BI, basal insulin; GLP-1 RA, glucagon-like peptide-1 receptor agonist

## Supplementary Table S2. Number of patient-treatments before and after PSM matching

| **Hypoglycemia definitiona** | **Insulin status** | **BI cohort** | **Gla-300** | | **Comparator** | |
| --- | --- | --- | --- | --- | --- | --- |
| **pre-PSM (N)** | **post-PSM (N)** | **pre-PSM (N)** | **post-PSM (N)** |
| **Severe hypoglycemia** | ***Insulin-naïve*** | ***Gla-100*** | 1574 | 1560 | 38,109 | 1560 |
| ***IDet*** | 1574 | 1569 | 14,064 | 1569 |
| ***IDeg*** | 1574 | 1083 | 2545 | 1083 |
| ***BI switchers*** | ***Gla-100*** | 3182 | 3166 | 17,173 | 3166 |
| ***IDet*** | 3182 | 3101 | 12,504 | 3101 |
| ***IDeg*** | 3182 | 2226 | 3944 | 2226 |
| **All hypoglycemia** | ***Insulin-naïve*** | ***Gla-100*** | 1574 | 1562 | 38,109 | 1562 |
| ***IDet*** | 1574 | 1569 | 14,064 | 1569 |
| ***IDeg*** | 1574 | 1083 | 2545 | 1083 |
| ***BI switchers*** | ***Gla-100*** | 3182 | 3173 | 17,173 | 3173 |
| ***IDet*** | 3182 | 3114 | 12,504 | 3114 |
| ***IDeg*** | 3182 | 2224 | 3944 | 2224 |

aPSM was performed separately for each hypoglycemia definition.

BI, basal insulin; PSM, propensity score matching

## Supplementary Figure S1. LIGHTNING study window schematic


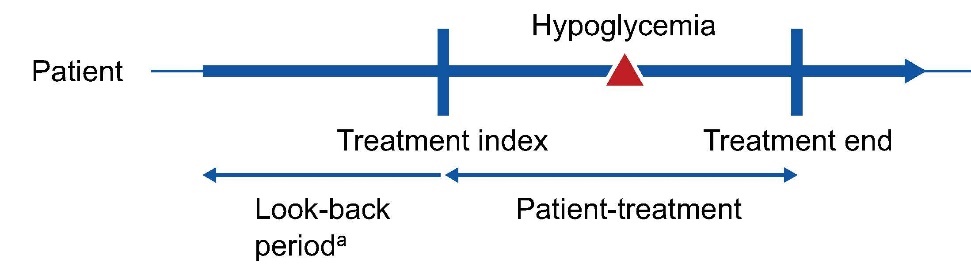


aBaseline period and time window for model covariate development.

**Supplementary Figure S2.** Overview of propensity score matching


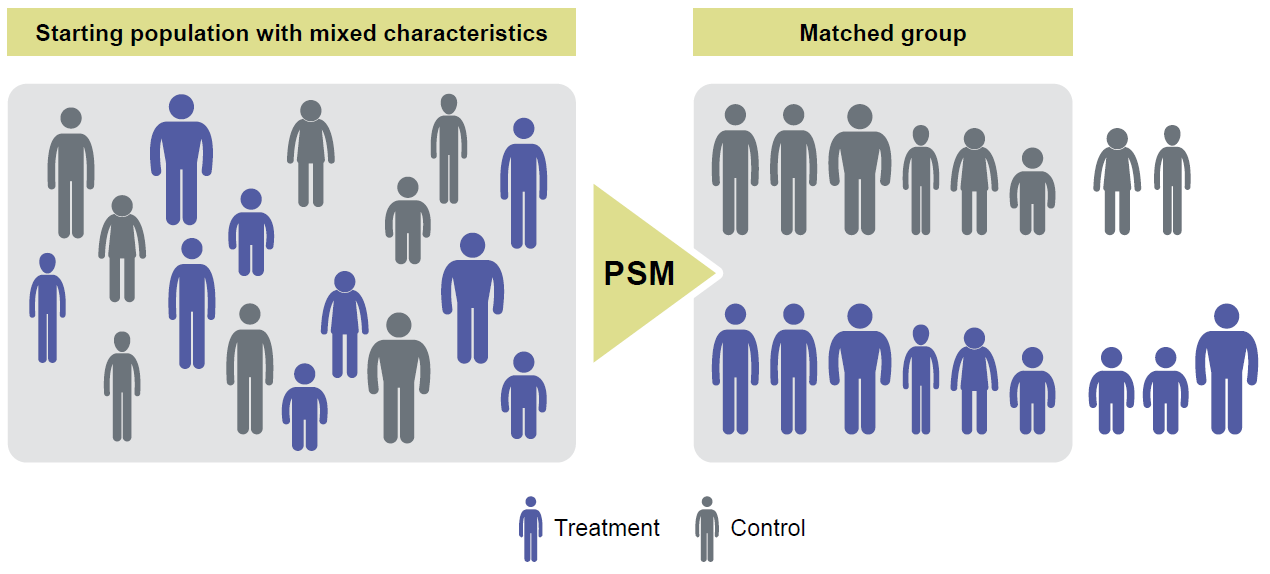
In non-randomized trials, the baseline characteristics of the treatment and control groups may differ. During PSM, the control group is matched on a one-to-one basis with the treatment group based on the similarity of their baseline characteristics. Following PSM, there is a population of matched individuals from the treatment and control groups that consequently have similar baseline characteristics without the need for randomization.

PSM, propensity score matching

## Supplementary Figure S3. Applying machine-learning to the prediction of hypoglycemia rates with basal insulins


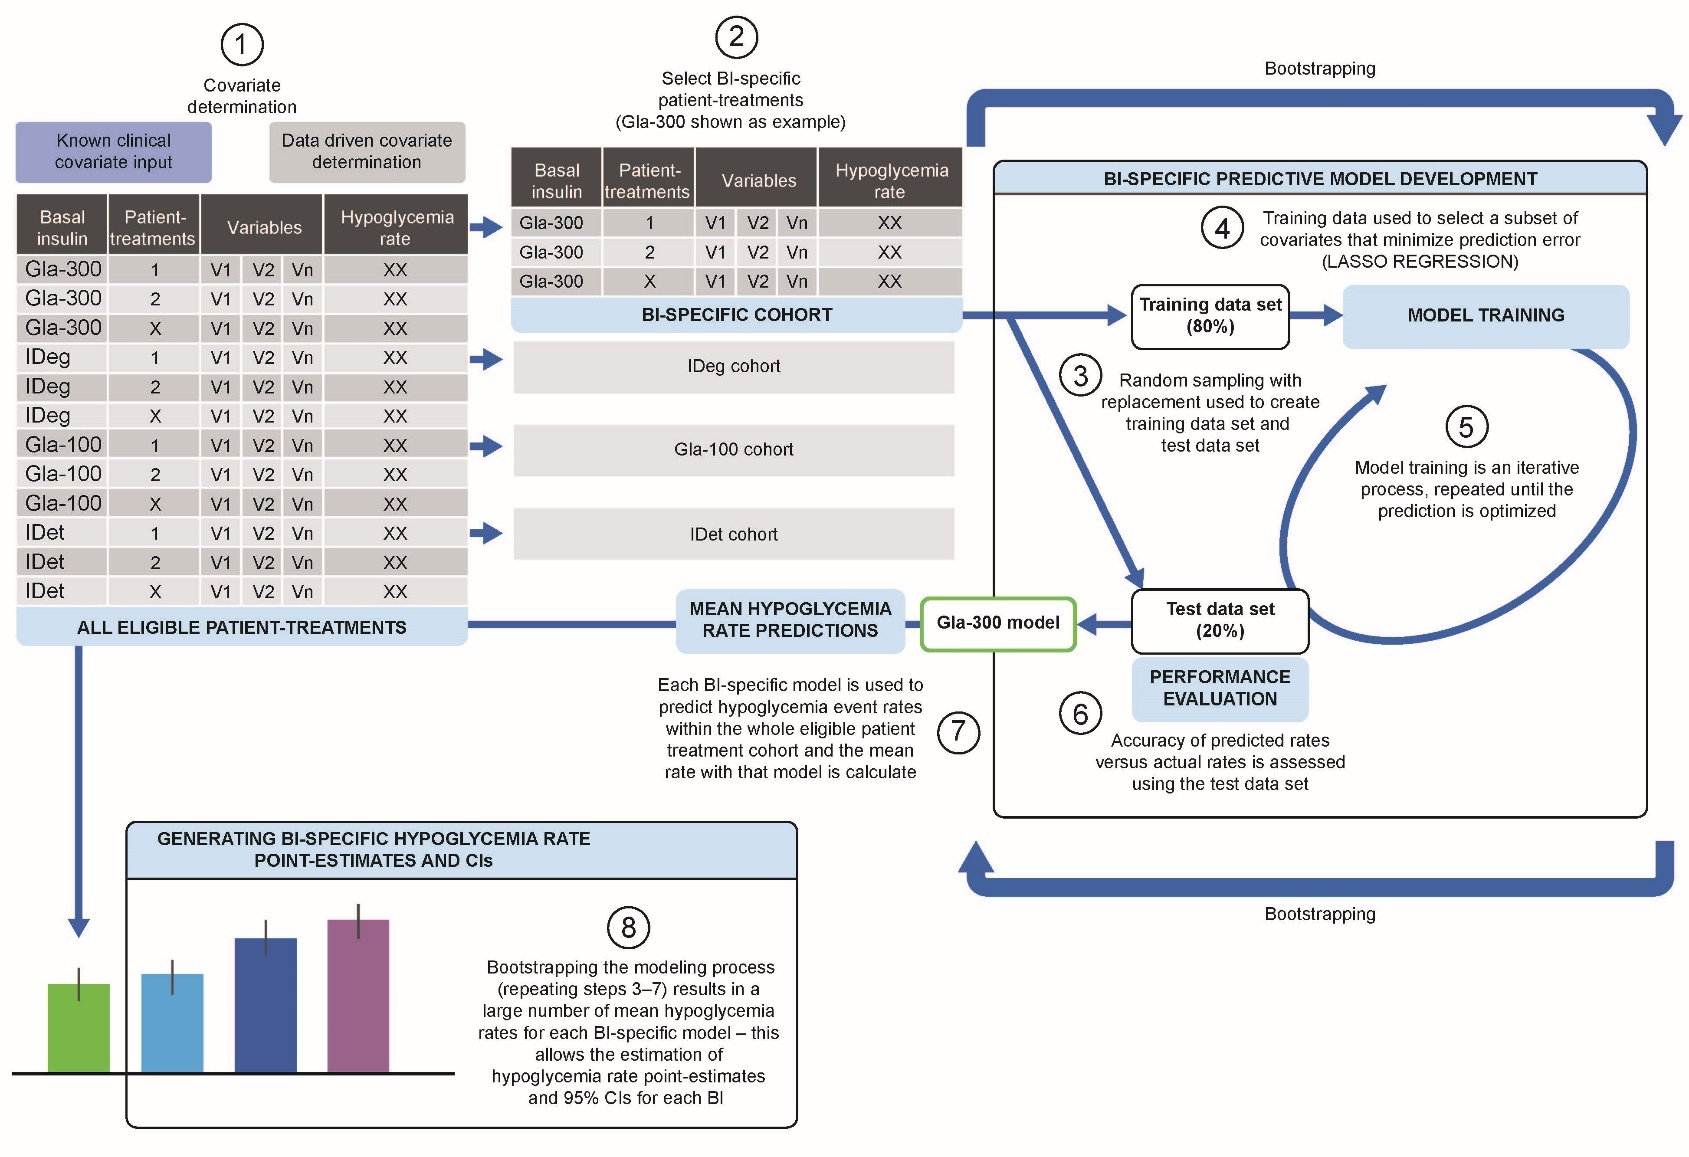


1. Covariates were determined from the full data set of patient-treatments that were available for analysis using manual input of known clinical covariates (based on knowledge of factors that affect hypoglycemia) and data-driven machine-learning-based covariate determination (hierarchical clustering, using all available data to capture variability in the data set).
2. BI-specific patient-treatments were selected (Gla-300 shown for demonstration purposes). Random sampling with replacement was applied to the BI-specific patient-treatment cohort to create a training data set (80% of the BI-specific patient-treatments, used to train the predictive model) and a test data set (20% of the BI-specific patient-treatments, used to test the model’s prediction accuracy). Because samples were replaced, a patient-treatment could be selected multiple times for a data sets, and the random selection ensured no two training and test data sets were the same.
3. Covariates were selected that best predicted hypoglycemia rates (ie, those that minimized the prediction error of the model), using LASSO regression performed on the training data set.
4. An iterative process of machine learning was used to optimize the predictive models.
5. Each trained BI-specific predictive model was applied to the test data set. The performance of each model was evaluated by comparing the model’s predicted hypoglycemia rates against the actual rates within the test data set using metrics such as AUC.
6. Each trained BI-specific predictive model was then applied to the full data set (all patient-treatments for all BIs) to generate a prediction of the mean hypoglycemia rate that would be expected if the specific BI were used in all patient-treatments.
7. The whole process is repeated with a new randomly selected sample of patient-treatments ~1000 times (an iterative process known as bootstrapping); this provides a spread of mean hypoglycemia rates (providing CIs) and a median point-estimate of the hypoglycemia rate.
8. The entire modeling process and iterative bootstrapping was performed separately for each BI to provide median point-estimates of hypoglycemic event rates (and corresponding CIs) for each BI model.

AUC, area under curve; BI, basal insulin; CI, confidence interval; LASSO, least absolute shrinkage and selection operator

## Supplementary Figure S4. Overview of differences in observed and predicted hypoglycemia rates with Gla-300 versus IDeg, Gla-100 and IDet


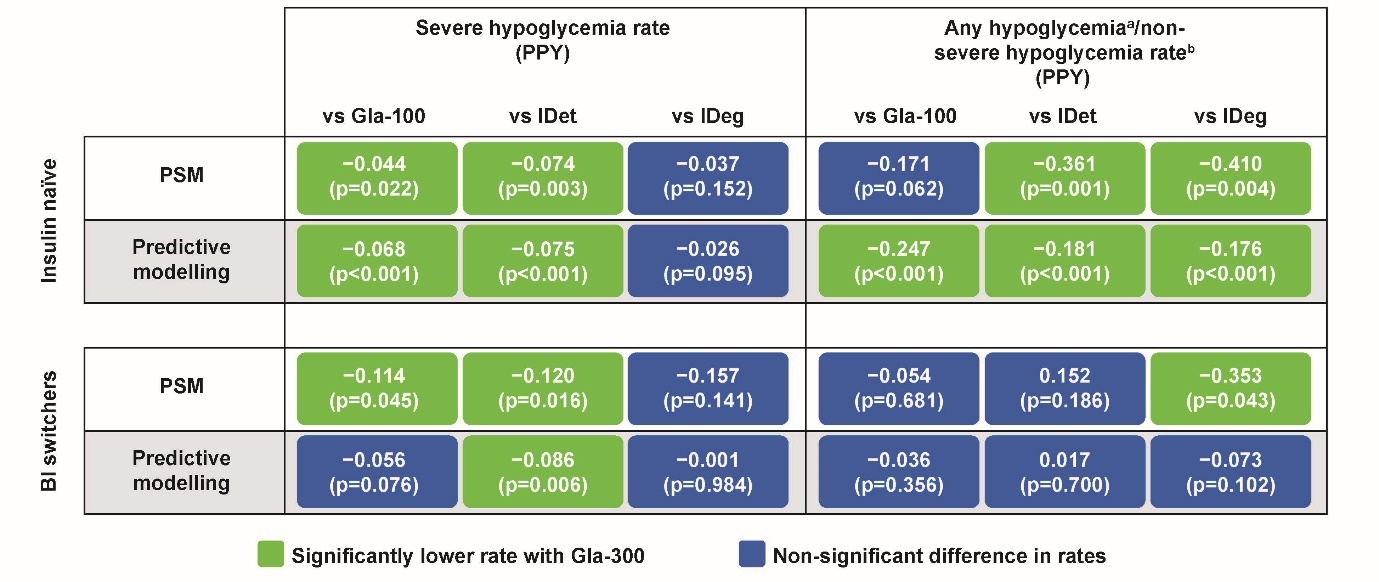


aAny hypoglycemia was measured in the PSM analysis; bNon-severe hypoglycemia was measured in the predictive modeling analysis

BI, basal insulin; PPY, per patient-year; PSM, propensity score matching

## Supplementary Figure S5. Sensitivity analysis of severe hypoglycemia without NLP and <54 mg/dL (<3.0 mmol/L) definitions. A) Severe hypoglycemic event rate following PSM; B) HbA1c change rate following PSM on severe hypoglycemia


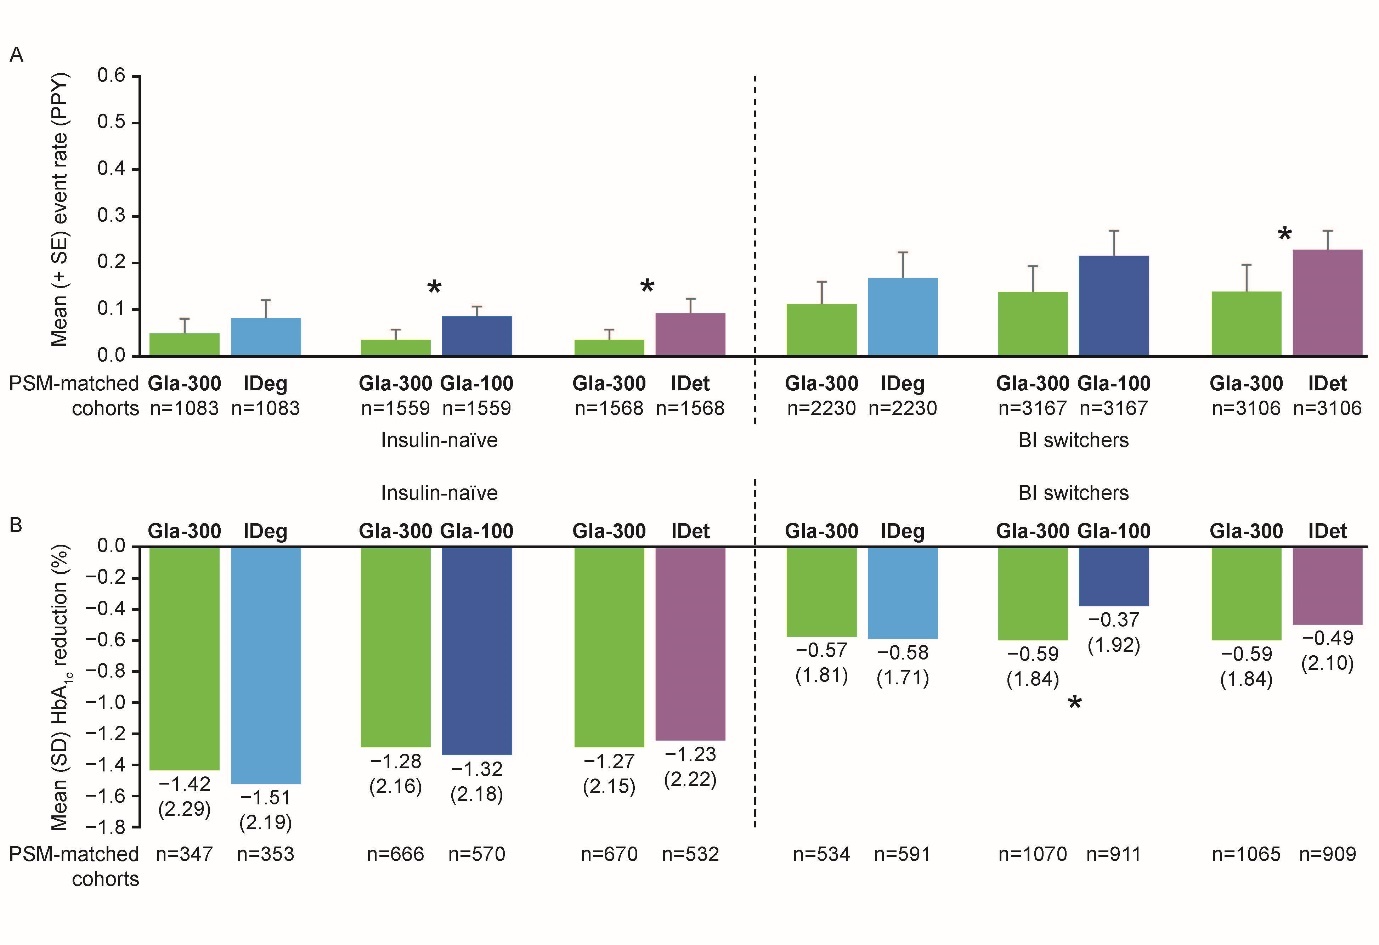


*p<0.05, Gla-300 vs BI comparator; SD shown as text on figure B.

BI, basal insulin; NLP, natural language processing; PPY, per patient-year; PSM, propensity score matching; SD, standard deviation; SE, standard error
