# Supplementary figures and images for: Rates of Hypoglycemia Predicted in Patients with Type 2 Diabetes on Insulin Glargine 300 U/ml Versus First- and Second-Generation Basal Insulin Analogs: The Real-World LIGHTNING Study
Source: Springer Nature journal article supplement (doi:10.1007/s13300-019-0568-8), 2019-02-14

Starting population with mixed characteristics

Matched group

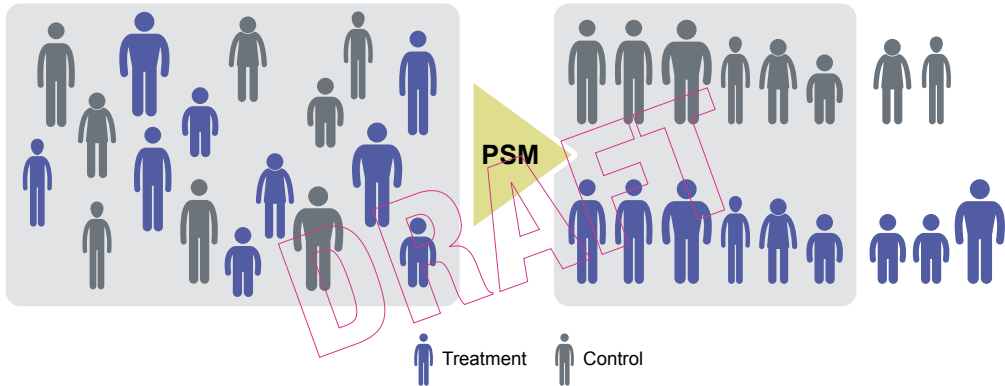

Supplement: MOESM3 [file 16481166]
